# Supplementary material
Source: PubMed Central journal article supplement (PMC6150433)

**Supplementary Figure S1.**

**Variation in number of identified human and microbial proteins.** Number of identified microbial and human proteins identified in each sample. Note outlier sample in bottom right corner was excluded from further analysis. \*Outlier was excluded from further analysis.

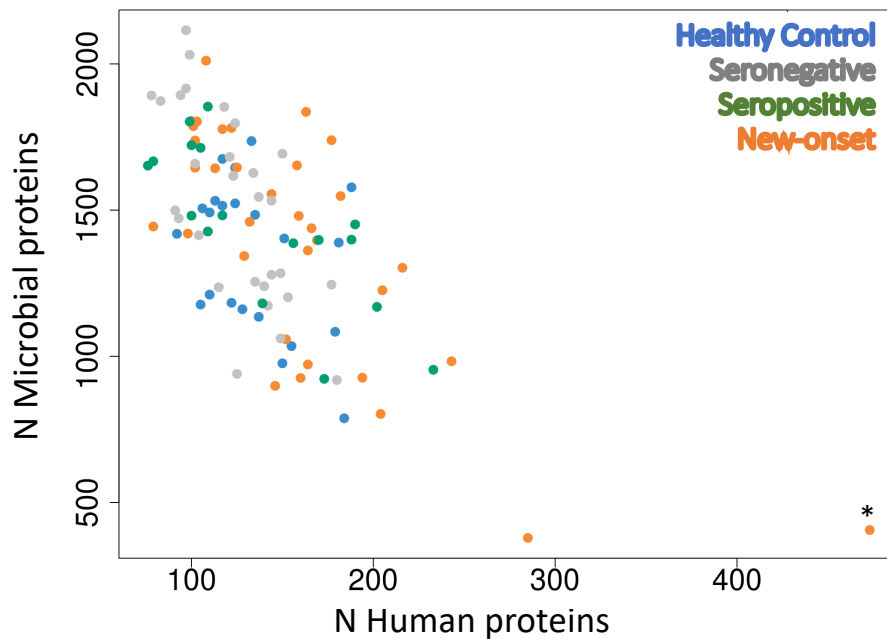

**Supplementary Figure S2.**

**sPLS-DA multi-variate analysis of stool proteins discriminates new-onset and seropositive individuals from healthy controls and seronegative individuals.** (A) Comparison of 4 individual groups. (B) New-onset and combined control groups. (C) Seropositive and combined control groups. (D-E) Component 1 contributing variables for each plot. Proteins in red text: human, black text : microbial. 158742018-stool1\_revised\_scaffold9355\_1\_gene110855 abbreviated as gene110855, 763577454-stool2\_revised\_C1073689\_1\_gene919 abbreviated as gene919, 160421117 stool1\_revised\_scaffold9704\_1\_gene20607 abbreviated as gene20607, 763536994 stool1\_revised\_scaffold21106\_2\_gene24946 abbreviated as gene24946 and 404239096 stool1\_revised\_scaffold7674\_1\_gene55807 abbreviated as gene55807.

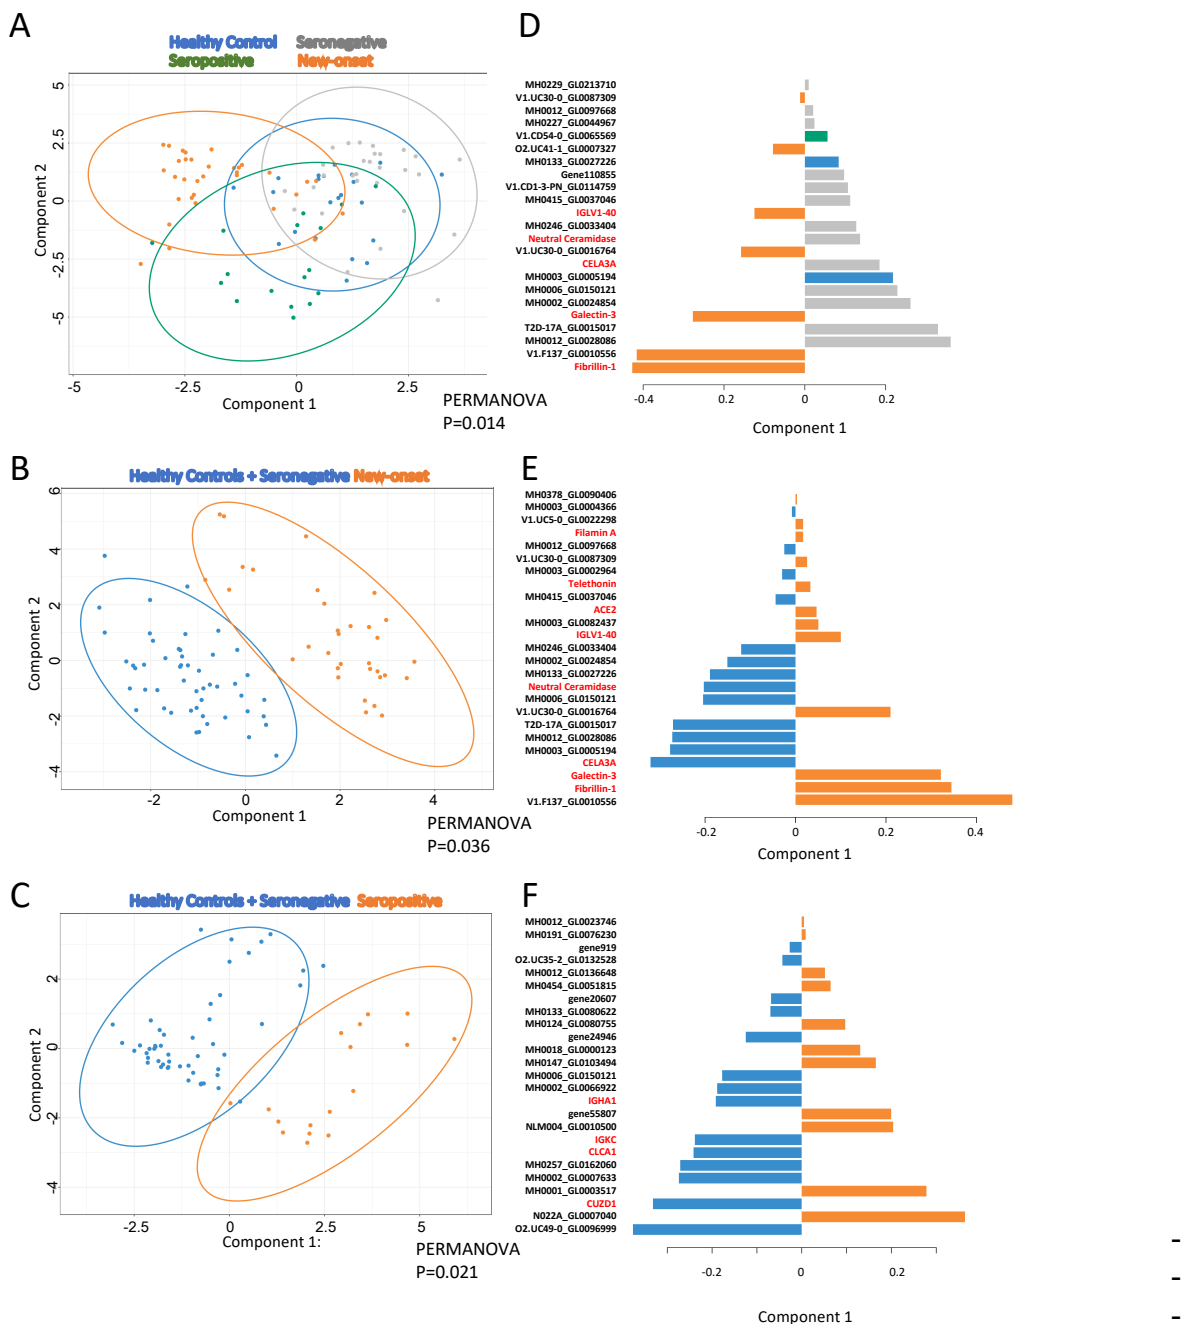

**Supplementary Figure S3.**

**Individual human proteins that significantly differ between new-onset, seropositive and control seronegative subject groups.** (A-G) Log normalized intensity of significant proteins comparing new-onset (NO), seropositive (SP) and combined healthy control and seronegative (CO/SN) subject groups by one-way ANOVA (adj  $P < 0.05$ ). Mean  $\pm$  SEM are shown. Circles: healthy controls, diamonds: seronegative individuals.

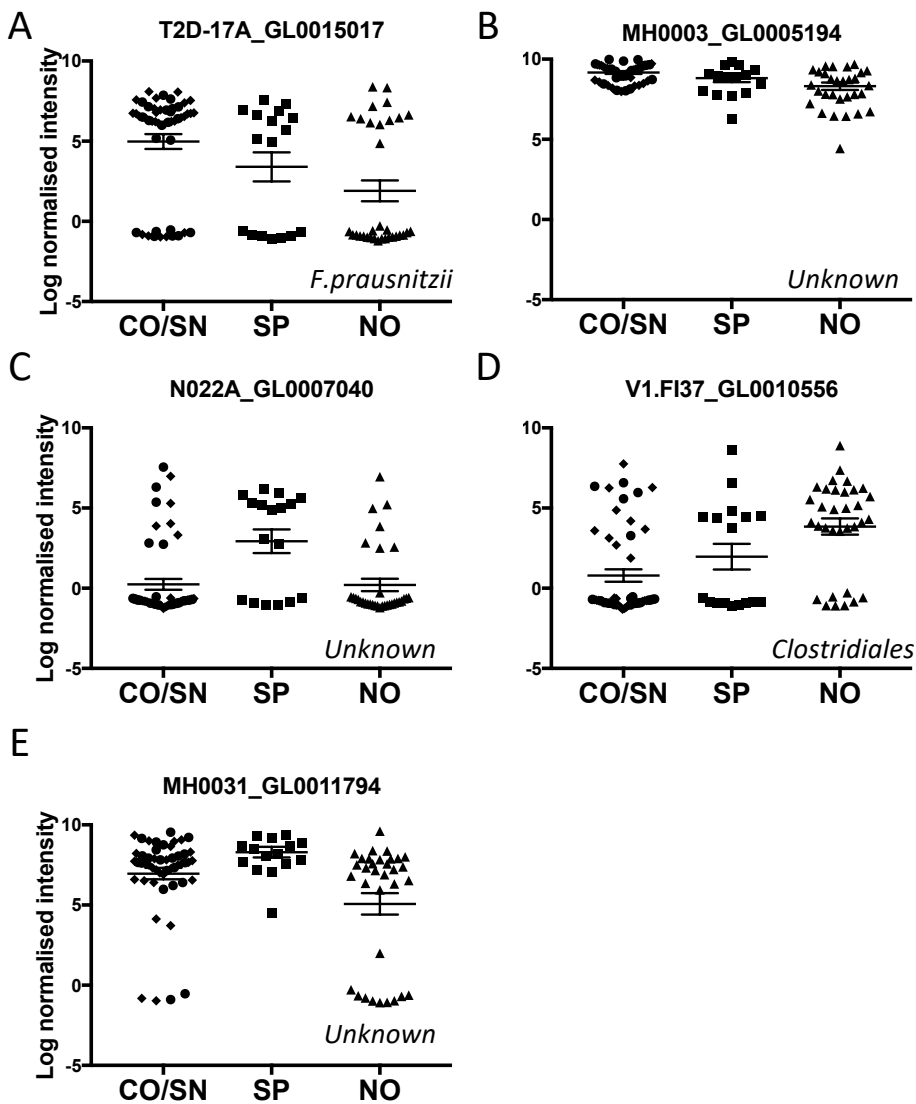

Supplementary Figure S4.

sPLS-DA multi-variate analysis of KEGG orthologues.

(A) sPLS-DA analysis of microbial KEGG orthologues, P=0.06. (B) Component 1 and 2 contributing variables

A

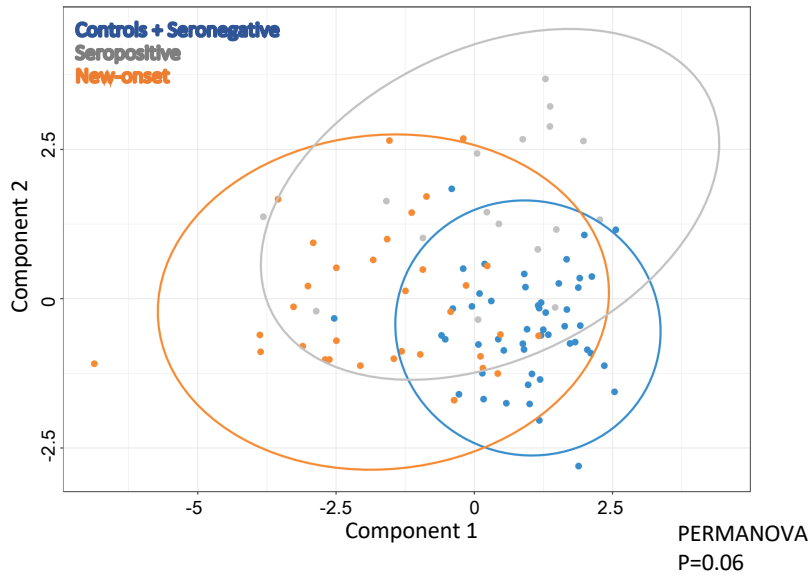

B

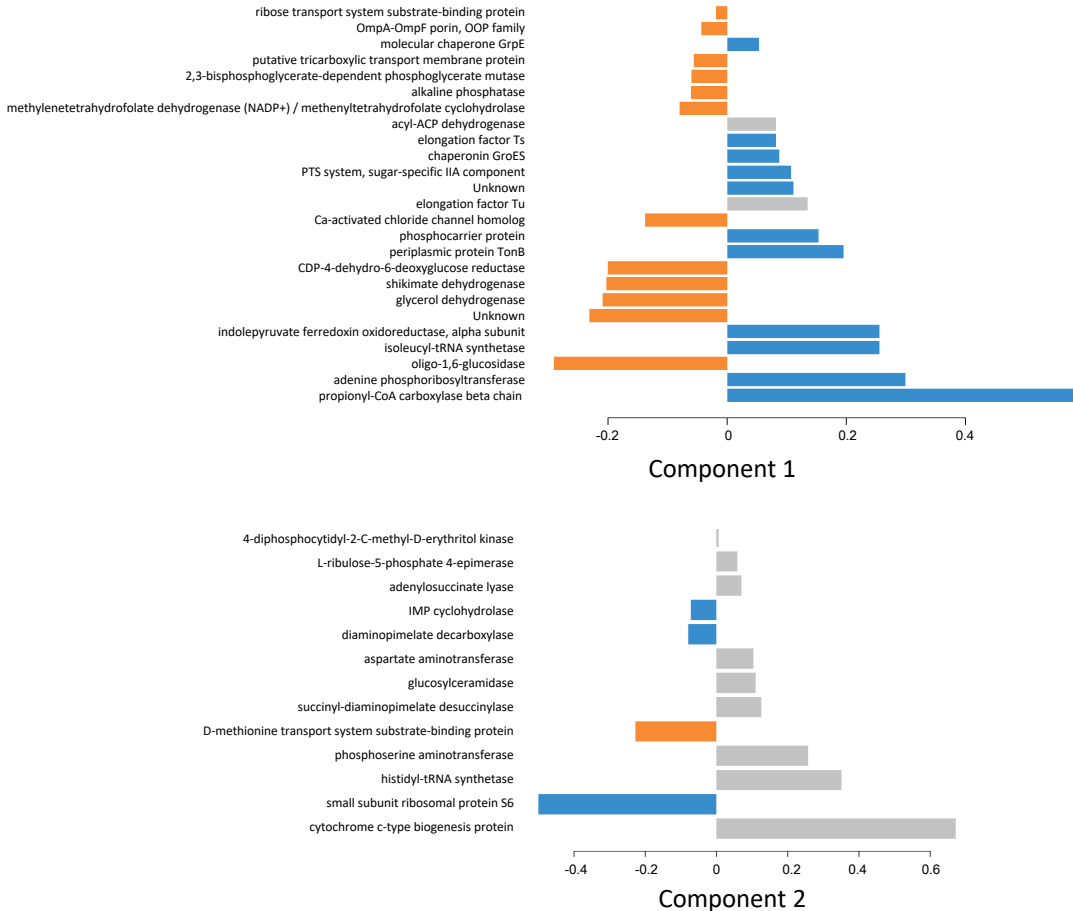



**Supplementary Figure S5.**

**Correlations between variables selected in the DIABLO models.**

Pearson's correlations were calculated between each of the variables selected in the DIABLO models depicted in Fig. 2A-B and visualized in a heat-map with hierarchical clustering analysis.

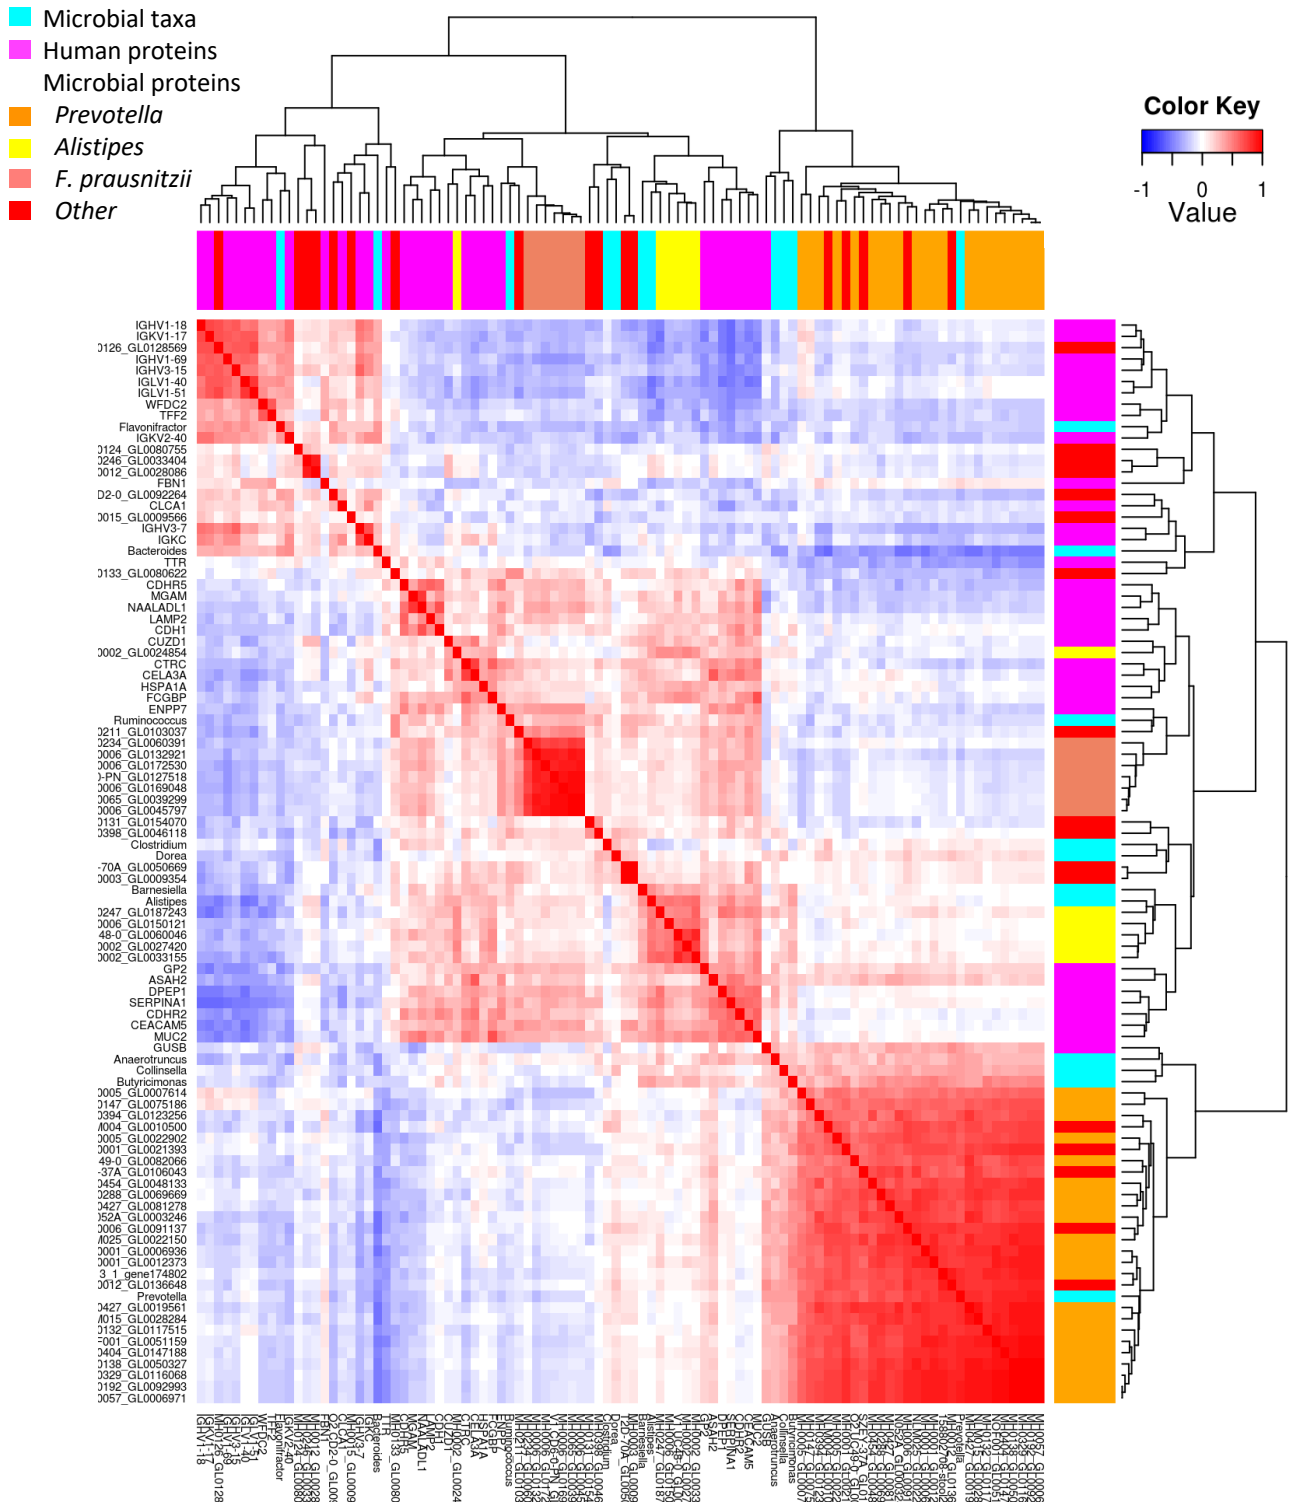

**Supplementary Figure S6.**

**Correlation between age and multivariate biomarker signature** Pearson's correlation between age and probability of being classified as NOD for (A) all subjects and (B) only subjects <25 years of age. C: Probability of being classified as NO for subjects <25 years. Probabilities were determined using a linear model developed on all CO/SN and NO patients. The ten proteins selected for this model included MH0003\_GL0005194, T2D.17A\_GL0015017, V1.FI37\_GL0010556, Galectin-3, MH0133\_GL0027226, Fibrillin-1, CELA3A, Neutral Ceramidase, MH0012\_GL0028086, and V1.UC30.0\_GL0016764. Blue dots control and seronegative, grey dots seropositive and orange dots new-onset subjects.

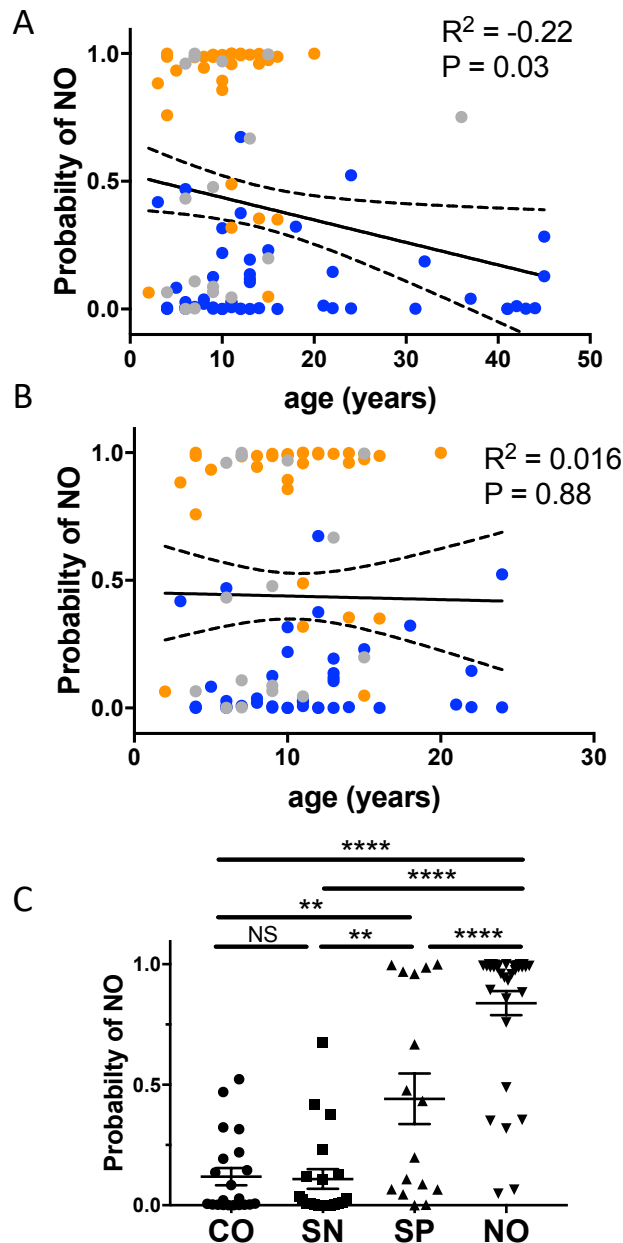

Supplement: DC180777SupplementaryData1.pdf [file DC180777SupplementaryData1.pdf]
